# Supplementary material
Source: Springer Nature journal article supplement (https://www.springermedizin.de/resource/supplementary/13014_2010_289_MOESM3_ESM.pdf/9633362)

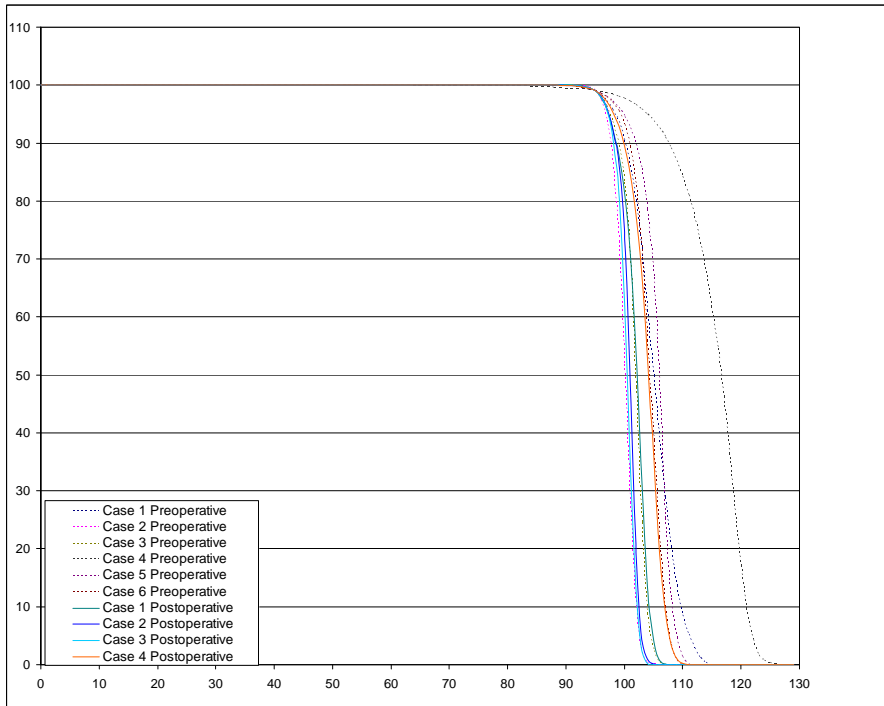

DVH PTV for 10 cases

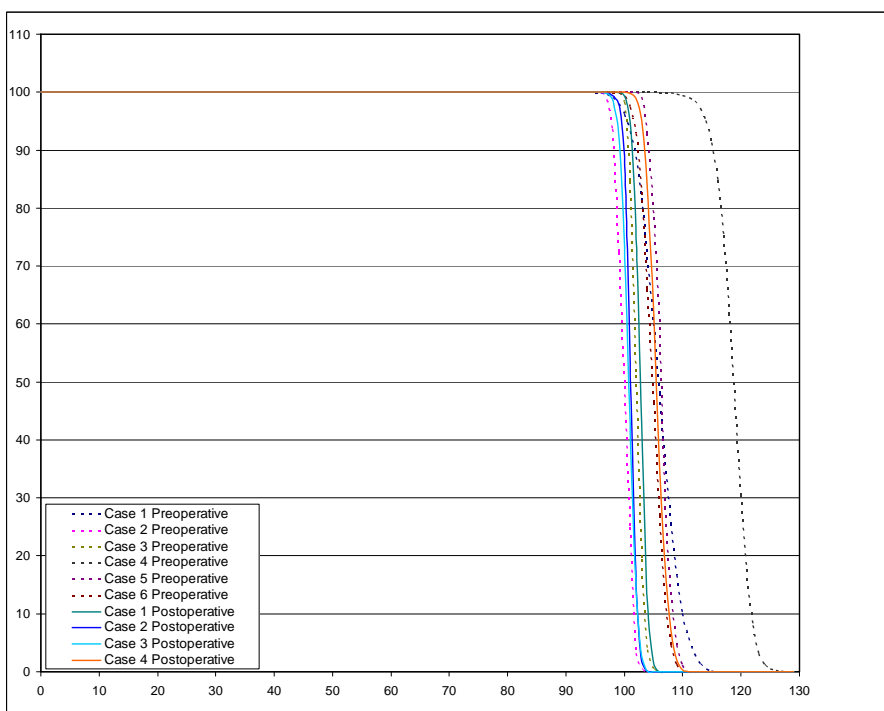

DVH GTV (preoperative) -CTV (postoperative) for 10 cases

Supplement: MOESM3 [file 9633362]
